# Supplementary material for: Myocardial Work Brings New Insights into Left Ventricular Remodelling in Cardio-Oncology Patients
Source: MDPI journal article supplement (doi:10.3390/ijerph19052826), 2022-02-28
Supplement: s1 [file s1]

**Table S1** Association of MW indices at baseline (T0) and CTRCD

| MW indices at T0 | CTRCD | p-value |
|------------------|-------|---------|
| GWl <1310 mmHg%  | 60.0% | 0.251   |
| GWl ≥1310 mmHg%  | 33.7% |         |
| GCW <1543 mmHg%  | 50.0% | 0.439   |
| GCW ≥1543 mmHg%  | 34.1% |         |
| GWw >278mmHg%    | 50.0% | 0.533   |
| GWw ≤278mmHg%    | 34.5% |         |
| GWE <90%         | 50.0% | 0.366   |
| GWE ≥90%         | 33.8% |         |

GWl: global work index, GCW: global constructive work, GWw: global wasted work, GWE: global work efficiency.

**Table S2** Association of clinical characteristics, therapy regimen and echocardiographic data with MW variation at T1 from baseline

|                                              | GWI     |                   |         | GWE     |                  |         | GCW     |                   |         | GWW     |                   |         |
|----------------------------------------------|---------|-------------------|---------|---------|------------------|---------|---------|-------------------|---------|---------|-------------------|---------|
|                                              | $\beta$ | 95% CI            | p-value | $\beta$ | 95% CI           | p-value | $\beta$ | 95% CI            | p-value | $\beta$ | 95% CI            | p-value |
| Baseline characteristics                     |         |                   |         |         |                  |         |         |                   |         |         |                   |         |
| Age (years)                                  | 0.123   | -0.289 to 0.536   | 0.553   | -0.039  | -0.104 to 0.026  | 0.239   | 0.210   | -0.152 to 0.572   | 0.252   | 0.291   | -1.146 to 1.729   | 0.687   |
| Hypertension                                 | -12.160 | -22.992 to -1.328 | 0.028   | -0.980  | -2.789 to 0.829  | 0.284   | -8.949  | -18.675 to 0.777  | 0.071   | 5.462   | -33.051 to 43.976 | 0.778   |
| Diabetes mellitus                            | -10.662 | -30.782 to 9.538  | 0.297   | -0.659  | -3.961 to 2.643  | 0.692   | -4.523  | -22.533 to 13.488 | 0.618   | -9.583  | -19.374 to 60.208 | 0.785   |
| Hypercholesterolemia                         | 4.576   | -6.736 to 15.887  | 0.423   | 0.010   | -1.839 to 1.859  | 0.991   | 6.016   | -3.973 to 16.004  | 0.234   | -0.887  | -39.940 to 38.166 | 0.964   |
| Obesity                                      | -18.226 | -30.512 to -5.939 | 0.004   | -2.976  | -4.949 to -1.004 | 0.004   | -15.190 | -26.426 to -3.955 | 0.009   | 19.144  | -25.681 to 63.909 | 0.397   |
| Smoking history                              | -6.806  | -19.124 to 5.511  | 0.274   | -0.633  | -2.649 to 1.382  | 0.533   | -5.061  | -16.027 to 0.905  | 0.361   | 37.781  | -3.955 to 79.518  | 0.075   |
| More than one cardiovascular risk factor     | -10.173 | -21.275 to 0.929  | 0.072   | -1.849  | -3.645 to -0.054 | 0.044   | -6.734  | -16.696 to 3.229  | 0.182   | 20.077  | -18.682 to 58.837 | 0.305   |
| Previous medication with ACE inhibitors/ARBs | -3.604  | -15.104 to 7.896  | 0.534   | -1.753  | -3.582 to 0.076  | 0.060   | 0.550   | -9.689 to 10.790  | 0.915   | 37.036  | -1.600 to 75.671  | 0.060   |
| Previous medication with beta-blocker        | -5.062  | -19.949 to 9.825  | 0.500   | -1.500  | -3.903 to 0.904  | 0.217   | -4.481  | -17.700 to 8.739  | 0.501   | 22.746  | -28.296 to 73.787 | 0.377   |
| Therapy regimen                              |         |                   |         |         |                  |         |         |                   |         |         |                   |         |
| Neoadjuvant chemotherapy                     | -7.905  | -18.282 to 2.472  | 0.133   | -1.311  | -3.001 to 0.379  | 0.126   | -1.960  | -11.329 to 7.409  | 0.678   | 48.529  | 14.163 to 82.894  | 0.006   |
| Adjuvant chemotherapy                        | 2.184   | -8.854 to 13.221  | 0.694   | 0.620   | -1.066 to 2.307  | 0.465   | 1.592   | -8.403 to 11.586  | 0.751   | -47.402 | -84.814 to -9.990 | 0.014   |
| Anthracyclines                               | -0.563  | -12.490 to 11.365 | 0.925   | 0.264   | -1.676 to 2.203  | 0.787   | 2.700   | -7.873 to 13.273  | 0.612   | 12.411  | -28.476 to 53.299 | 0.547   |
| Doxorubicin                                  | 4.164   | -6.549 to 14.878  | 0.441   | 0.388   | -1.334 to 2.111  | 0.654   | 4.825   | -4.761 to 14.412  | 0.319   | -24.644 | -61.004 to 11.717 | 0.181   |
| Epirubicin                                   | -4.150  | -14.782 to 6.482  | 0.439   | -0.069  | -1.781 to 1.643  | 0.936   | -2.518  | -12.082 to 7.046  | 0.601   | 32.670  | -3.037 to 68.377  | 0.072   |
| Cumulative dose                              | -0.026  | -0.092 to 0.041   | 0.441   | 0.007   | -0.003 to 0.017  | 0.187   | -0.032  | -0.093 to 0.029   | 0.303   | -0.100  | -0.356 to 0.155   | 0.434   |
| Anti-HER                                     |         |                   |         |         |                  |         |         |                   |         |         |                   |         |
| Trastuzumab                                  | -3.776  | -21.187 to 13.636 | 0.667   | -0.687  | -3.519 to 2.145  | 0.630   | -3.709  | -19.166 to 11.747 | 0.634   | 7.749   | -52.140 to 67.637 | 0.797   |
| Pertuzumab                                   | -2.256  | -12.996 to 8.484  | 0.676   | -0.125  | -1.874 to 1.624  | 0.887   | -1.498  | -11.040 to 8.044  | 0.755   | 10.969  | -25.895 to 47.833 | 0.555   |
| TDM-1                                        | -1.775  | -16.125 to 12.576 | 0.806   | 1.328   | -0.986 to 3.642  | 0.256   | -5.944  | -18.614 to 6.725  | 0.353   | -32.065 | -80.809 to 16.679 | 0.194   |
| Cyclophosphamide                             | -1.170  | -13.314 to 10.974 | 0.848   | 0.463   | -1.481 to 2.408  | 0.636   | 2.644   | -8.239 to 13.527  | 0.629   | 7.475   | -34.076 to 49.025 | 0.721   |
| Taxane                                       | -14.174 | -36.468 to 8.121  | 0.209   | 0.789   | -2.875 to 4.453  | 0.669   | -13.524 | -33.286 to 6.239  | 0.177   | -1.437  | -78.931 to 76.056 | 0.971   |

|                              |               |                  |       |        |                 |       |         |                  |       |        |                   |       |
|------------------------------|---------------|------------------|-------|--------|-----------------|-------|---------|------------------|-------|--------|-------------------|-------|
| Radiation therapy            | -6.242        | -18.077 to 5.994 | 0.296 | -1.520 | -3.427 to 0.386 | 0.116 | -2.560  | -13.134 to 8.015 | 0.631 | 20.106 | -20.607 to 60.819 | 0.328 |
| Chemotherapy time (months)   | -1.223        | -3.350 to 0.904  | 0.255 | 0.047  | -0.310 to 0.404 | 0.794 | -1.143  | -3.053 to 0.768  | 0.237 | -2.930 | -10.427 to 4.568  | 0.438 |
| Anti-HER time (months)       | -0.029        | -0.262 to 0.203  | 0.801 | 0.010  | -0.029 to 0.048 | 0.623 | -0.066  | -0.272 to 0.140  | 0.522 | -0.334 | -1.140 to 0.471   | 0.410 |
| 2D parameters                |               |                  |       |        |                 |       |         |                  |       |        |                   |       |
| LV end-diastolic volume (ml) | -0.220        | -0.483 to 0.043  | 0.099 | -0.034 | -0.077 to 0.009 | 0.118 | -0.171  | -0.406 to 0.064  | 0.150 | 0.626  | -0.287 to 1.539   | 0.176 |
| LV end-systolic volume (ml)  | -0.203        | -0.723 to 0.316  | 0.438 | -0.062 | -0.146 to 0.022 | 0.144 | -0.234  | -0.694 to 0.225  | 0.313 | 0.906  | -0.873 to 2.685   | 0.313 |
| LVEF (%)                     | -0.338        | -1.031 to 0.355  | 0.334 | 0.022  | -0.092 to 0.135 | 0.703 | -0.032  | -0.652 to 0.588  | 0.918 | -0.127 | -2.528 to 2.274   | 0.916 |
| GLS (%)                      | 2.054         | 0.155 to 3.952   | 0.034 | -0.006 | -0.329 to 0.317 | 0.969 | 1.031   | -0.696 to 2.759  | 0.237 | -5.588 | -11.494 to 0.319  | 0.063 |
| LV stroke volume (ml)        | -0.384        | -0.847 to 0.079  | 0.101 | -0.011 | -0.088 to 0.066 | 0.769 | -0.378  | -0.771 to 0.015  | 0.059 | 0.283  | -1.012 to 1.578   | 0.660 |
| LV cardiac output (l/min)    | -1.348        | -5.730 to 3.035  | 0.537 | -0.363 | -1.056 to 0.330 | 0.295 | -0.883  | -4.652 to 2.885  | 0.637 | -0.378 | -0.771 to 0.015   | 0.059 |
| LA diameter (mm)             | -0.360        | -1.525 to 0.804  | 0.539 | -0.145 | -0.332 to 0.041 | 0.125 | -0.114  | -1.151 to 0.924  | 0.828 | 2.360  | -1.604 to 6.324   | 0.239 |
| LA volume (ml)               | <b>-0.380</b> | -0.726 to -0.034 | 0.032 | -0.039 | -0.099 to 0.020 | 0.189 | -0.356  | -0.676 to 0.037  | 0.029 | 0.277  | -1.070 to 1.624   | 0.682 |
| Transmitral E/A ratio        | -10.174       | -21.737 to 1.389 | 0.084 | -0.458 | -2.384 to 1.468 | 0.637 | -12.015 | -22.0 to 2.029   | 0.019 | 0.317  | -40.240 to 40.873 | 0.988 |
| Mitral E/e' ratio            | 1.799         | -0.448 to 4.047  | 0.114 | 0.069  | -0.301 to 0.439 | 0.711 | 1.637   | -0.287 to 3.561  | 0.094 | -2.257 | -9.161 to 4.647   | 0.516 |
| TAPSE (mm)                   | -1.761        | -3.221 to -0.301 | 0.119 | -0.056 | -0.300 to 0.189 | 0.651 | -1.052  | -2.388 to 0.285  | 0.121 | 3.509  | -1.617 to 8.636   | 0.176 |
| Tricuspid S' (cm/s)          | -0.892        | -3.219 to 1.435  | 0.446 | 0.221  | -0.151 to 0.594 | 0.239 | -0.794  | -2.814 to 1.227  | 0.435 | 2.122  | -5.853 to 10.097  | 0.596 |
| 3D parameters                |               |                  |       |        |                 |       |         |                  |       |        |                   |       |
| LV end-diastolic volume (ml) | -0.327        | -0.802 to 0.147  | 0.168 | -0.025 | -0.087 to 0.038 | 0.430 | -0.243  | -0.651 to 0.165  | 0.232 | 0.406  | -1.156 to 1.967   | 0.598 |
| LV end-systolic volume (ml)  | -0.397        | -1.339 to 0.546  | 0.395 | -0.018 | -0.141 to 0.106 | 0.770 | -0.334  | -1.136 to 0.468  | 0.400 | -0.378 | -3.420 to 2.664   | 0.801 |
| LVEF (%)                     | -0.537        | -2.059 to 0.986  | 0.475 | -0.048 | -0.246 to 0.150 | 0.623 | -0.256  | -1.56 to 1.048   | 0.690 | 2.894  | -1.863 to 7.652   | 0.222 |

GWI: global work index, GWE: global work efficiency, GCW: global constructive work, GWW: global wasted work, CI: confidence interval, ACE: Angiotensin-converting enzyme, ARB: Angiotensin II receptor blocker, HER2: human epidermal growth factor receptor, TDM-1: Trastuzumab emtansine, 2D: two-dimensional, LV: left ventricle, LVEF: left ventricle ejection fraction, GLS: global longitudinal strain, LA: left atrium, 3D: three-dimensional.
